# Supplementary material
Source: HighWire-hosted journal article supplement (http://molpharm.aspetjournals.org/highwire/filestream/77155/field_highwire_adjunct_files/1/Supplemental_Table_2.pdf)
Supplement: Supplemental_Table_2.pdf [file Supplemental_Table_2.pdf]

**Direct Transcriptional Regulation of Human Hepatic Cytochrome P450 3A4 (CYP3A4) by Peroxisome Proliferator-Activated Receptor Alpha (PPAR $\alpha$ )**

Maria Thomas, Oliver Burk, Britta Klumpp, Benjamin A. Kandel, Georg Damm, Thomas S. Weiss, Kathrin Klein,  
Matthias Schwab, Ulrich M. Zanger  
**Molecular Pharmacology**

**Supplemental Table 2: Oligonucleotides used in EMSA**

| Motif                       | +/- strand oligonucleotides                                                                                                 |
|-----------------------------|-----------------------------------------------------------------------------------------------------------------------------|
| PPRE (rat acyl CoA oxidase) | GAT CTG AAC GTG ACC TTT GTC CTG GTC CG<br>GAT CCG GAC <u>CAG GAC AAA GGT CAC</u> GTT CA                                     |
| DR1-A                       | GAT CCT TAG <u>GGT ACA AAG TTG ACC</u> AAG A<br>GAT CTC TTG GTC AAC TTT GTA CCC TAA G                                       |
| mut DR1-A                   | GAT CCT TAG <b><i>GCC</i></b> <u>ACA AAC CTG ACC</u> AAG A<br>GAT CTC TTG GTC AGG TTT GTG GCC TAA G                         |
| DR1-B                       | GAT CCG AGA TTG AAC TTT GAT CCA ATG A<br>GAT CTC ATT <u>GGA TCA AAG TTC AAT</u> CTC G                                       |
| mut DR1-B                   | GAT CCG ATT GAA GGA AGA TCC AAT A<br>GAT CTA TTG <u>GAT <b><i>CTT CCT</i></b> TCA ATC</u> G                                 |
| DR1/DR2-C                   | GAT CCT GTC <u>CCA ATT AAA GGT CAT AAA GCC CAG</u> TTT A<br>GAT CTA AAC TGG GCT TTA TGA CCT TTA ATT GGG ACA G               |
| mut DR1/DR2-C               | GAT CCT GTC <u>CCA ATT AAA <b><i>CAA</i></b> CAT AAA GCC CAG</u> TTT A<br>GAT CTA AAC TGG GCT TTA TGT TGT TTA ATT GGG ACA G |
| DR1-D                       | GAT CCT CAC <u>AAG GGC AAA GGA CAT</u> GAA CA<br>GAT CTG TTC ATG TCC TTT GCC CTT GTG AG                                     |
| mut DR1-D                   | GAT CCT CAC <u>AAC <b><i>CGC</i></b> AAA <b><i>CCA</i></b> CAT</u> GAA CA<br>GAT CTG TTC ATG TGG TTT GCG GTT GTG AG         |

Within the respective strand showing the AGGTCA consensus motif, DR1/DR2 motifs are underlined and mutated bases are indicated in bold and italics.
